# Supplementary material for: Gsdma3 regulates hair follicle differentiation via Wnt5a-mediated non-canonical Wnt signaling pathway
Source: PubMed Central journal article supplement (PMC5725018; doi:10.18632/oncotarget.22212), 2017-10-31
Supplement: oncotarget-08-100269-s001.pdf [file oncotarget-08-100269-s001.pdf]

# Gsdma3 regulates hair follicle differentiation via Wnt5a-mediated non-canonical Wnt signaling pathway

## SUPPLEMENTARY MATERIALS

Supplementary Table 1: Primers used for PCR

| Gene name            | Primer sequences (5'-3' orientation) |
|----------------------|--------------------------------------|
| Wnt5a Fwd            | CTCCTCGCCAGGTTGTATAG                 |
| Wnt5a Rev            | GGTCCTGATACAAGTGGCAGAGT              |
| Gapdh Fwd            | GACATCAAGAAGGTGGTGAAGC               |
| Gapdh Rev            | GAAGGTGGAAGAGTGGGAGTT                |
| Frizzled1 Fwd        | ACTATAACCATCTTGGCGTTGG               |
| Frizzled1 Rev        | TGAACAGATAAACGAAGAGAGGC              |
| Frizzled2 Fwd        | GCCGTCCTATCTCAGCTATAAGT              |
| Frizzled2 Rev        | TCTCCTCTTGGCAGAGAAGACATA             |
| Frizzled3 Fwd        | CGTCACAAGATTCCGTTACCC                |
| Frizzled3 Rev        | CTACTCGGTCTCCAGCAAAA                 |
| Frizzled4 Fwd        | GCCCCACAAGACTCCCATC                  |
| Frizzled4 Rev        | CCAGCATCGTAGCCACT                    |
| Frizzled6 Fwd        | TCTTCCCTAACCTGATGGGTC                |
| Frizzled6 Rev        | ACAATTTCCGACAGGGTAGAAC               |
| Frizzled7 Fwd        | AGACCCACCTTTCCTGCG                   |
| Frizzled7 Rev        | AAGTACATGAGGCCGTTAGCA                |
| Frizzled8 Fwd        | GGGTACCTGTTGGAAGTGAC                 |
| Frizzled8 Rev        | GGCACCGTGATCTCTTGGC                  |
| Frizzled9 Fwd        | TTGCTCTATTATTCCGGGATGGC              |
| Frizzled9 Rev        | CAGGACCACGATAGTTTTGAGTG              |
| Frizzled10 Fwd       | GCAAGCTCCCCAACAGAAC                  |
| Frizzled10 Rev       | CCCGTCCTTTAGTGGGTGC                  |
| LRP5 Fwd             | CGCAGGGCGTACCTAGATG                  |
| LRP5 Rev             | CGAGTCACCTCAATTCTGTCAG               |
| LRP6 Fwd             | TTGTTGCTTTATGCAAACAGACG              |
| LRP6 Rev             | GTTCTGTTAATGGCTTCTTCGC               |
| $\beta$ -catenin Fwd | ATGGAGCCGGACAGAAAAGC                 |
| $\beta$ -catenin Rev | CTTGCCACTCAGGAAGGA                   |
| Lef1 Fwd             | AACGAGTCCGAAATCATCCCA                |
| Lef1 Rev             | GCCAGAGTAACTGGAGTAGGA                |
| P53 Fwd              | ATTGTATCCCAGTATCTG                   |
| P53 Rev              | GGTATACTCAGAGCCGGCCT                 |
| P21 Fwd              | AATGGAGACAGAGACCCAGCA                |
| P21 Rev              | TAAGGGCCCTACCGTCTAC                  |
| CyclinB1 Fwd         | TCTCGAATCGGGGAACCTCT                 |
| CyclinB1 Rev         | TCGGGCTTGGAGAGGGATTA                 |
| CDK1 Fwd             | ACAGAGAGGGTCCGTCGTAA                 |
| CDK1 Rev             | AAAGTACGGGTGCTTCAGGG                 |
| Timp1 Fwd            | TACCATGATGGCCCCCTTG                  |
| Timp1 Rev            | ACTCTTCACTGCGGTTCTGG                 |

Fwd, forward primer; Rev, reverse primer.
